# Supplementary material for: ISODISTROTLaMTeO6 (M = Ga3+ and Mn3+): the critical role of electronic configuration and cation ordering in crystal structures
Source: Royal Society of Chemistry journal article supplement (doi:10.1039/d4dt01486c), 2024-01-01
Supplement: d4dt01486c1.pdf [file d4dt01486c1.pdf]

Supporting information for

**LaMTeO<sub>6</sub> (*M* = Ga<sup>3+</sup> and Mn<sup>3+</sup>): the critical role of electronic  
configuration and cation ordering in crystal structures**

Shunjie Tang,<sup>a</sup> Yuxuan Qi,<sup>b</sup> Pengfei Jiang,<sup>\*a</sup> and Tao Yang<sup>\*a</sup>

<sup>a</sup> College of Chemistry and Chemical Engineering, Chongqing University, Chongqing  
401331, China.

<sup>b</sup> Chongqing Academy of Metrology & Quality Inspection, Chongqing 401121, China.

Corresponding authors: pengfeijiang@cqu.edu.cn; taoyang@cqu.edu.cn.

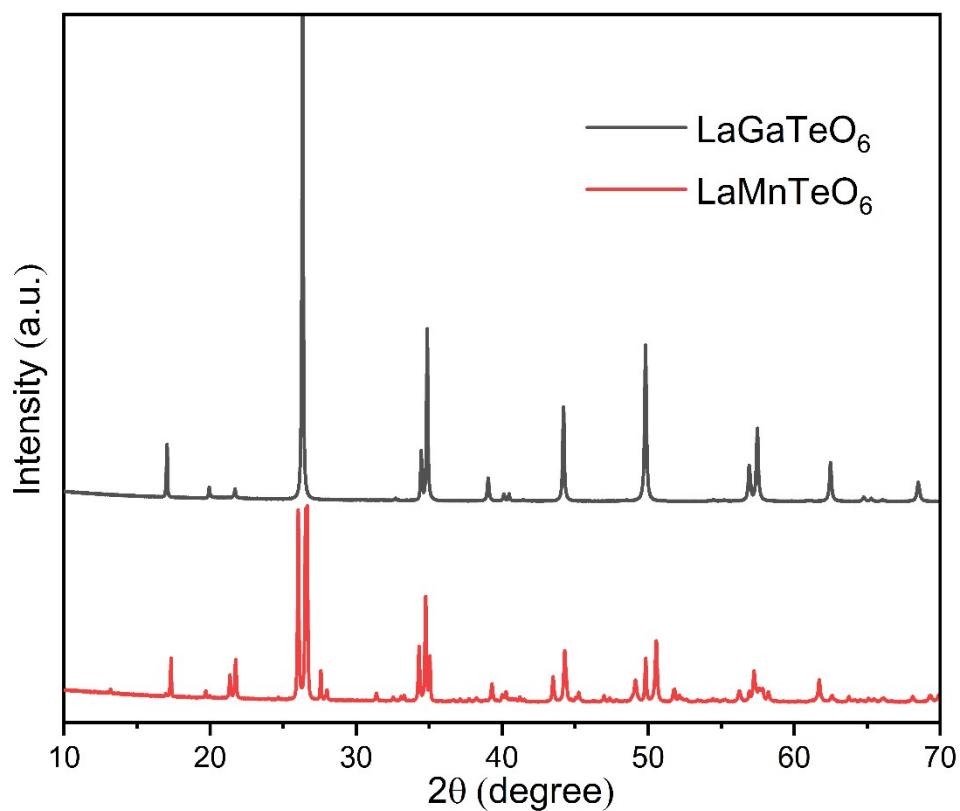

**Fig. S1** High-resolution XRPD patterns for  $\text{LaMTeO}_6$  with  $M = \text{Ga}^{3+}$  and  $\text{Mn}^{3+}$ .

**Table S1.** Selected interatomic bond distances for trigonal  $\text{LaGaTeO}_6$ .

| bond      | length (Å) |
|-----------|------------|
| La-O1 × 6 | 2.413(2)   |
| Ga-O1 × 6 | 1.980(2)   |
| Te-O1 × 6 | 1.972(2)   |

**Table S2.** Selected interatomic bond distances for monoclinic LaMnTeO<sub>6</sub>.

| bond   | length (Å) |
|--------|------------|
| La-O1  | 2.494(8)   |
| La-O2  | 2.489(8)   |
| La-O3  | 2.373(8)   |
| La-O4  | 2.41(1)    |
| La-O5  | 2.386(8)   |
| La-O6  | 2.53(1)    |
| <La-O> | 2.446      |
| Mn-O1  | 2.017(8)   |
| Mn-O2  | 1.868(8)   |
| Mn-O3  | 1.909(9)   |
| Mn-O4  | 2.10(1)    |
| Mn-O5  | 2.09(1)    |
| Mn-O6  | 2.004(7)   |
| <Mn-O> | 1.997      |
| Te-O1  | 1.940(7)   |
| Te-O2  | 2.042(8)   |
| Te-O3  | 2.044(9)   |
| Te-O4  | 1.944(7)   |
| Te-O5  | 1.94(1)    |
| Te-O6  | 1.88(1)    |
| <Te-O> | 1.964      |
